# Supplementary material for: Unraveling NPR-like Family Genes in Fragaria spp. Facilitated to Identify Putative NPR1 and NPR3/4 Orthologues Participating in Strawberry-Colletotrichum fructicola Interaction
Source: MDPI journal article supplement (doi:10.3390/plants11121589), 2022-06-16

**Figure S1.** Comparing motif compositions of NPR1-like deduced proteins from strawberry with Arabidopsis. Boxes in different colors represent distinct motifs identified at MEME (<http://meme-suite.org>, accessed on 11 Oct. 2021). The p-value shows the degree for overall matching to the con-sensus motif model.

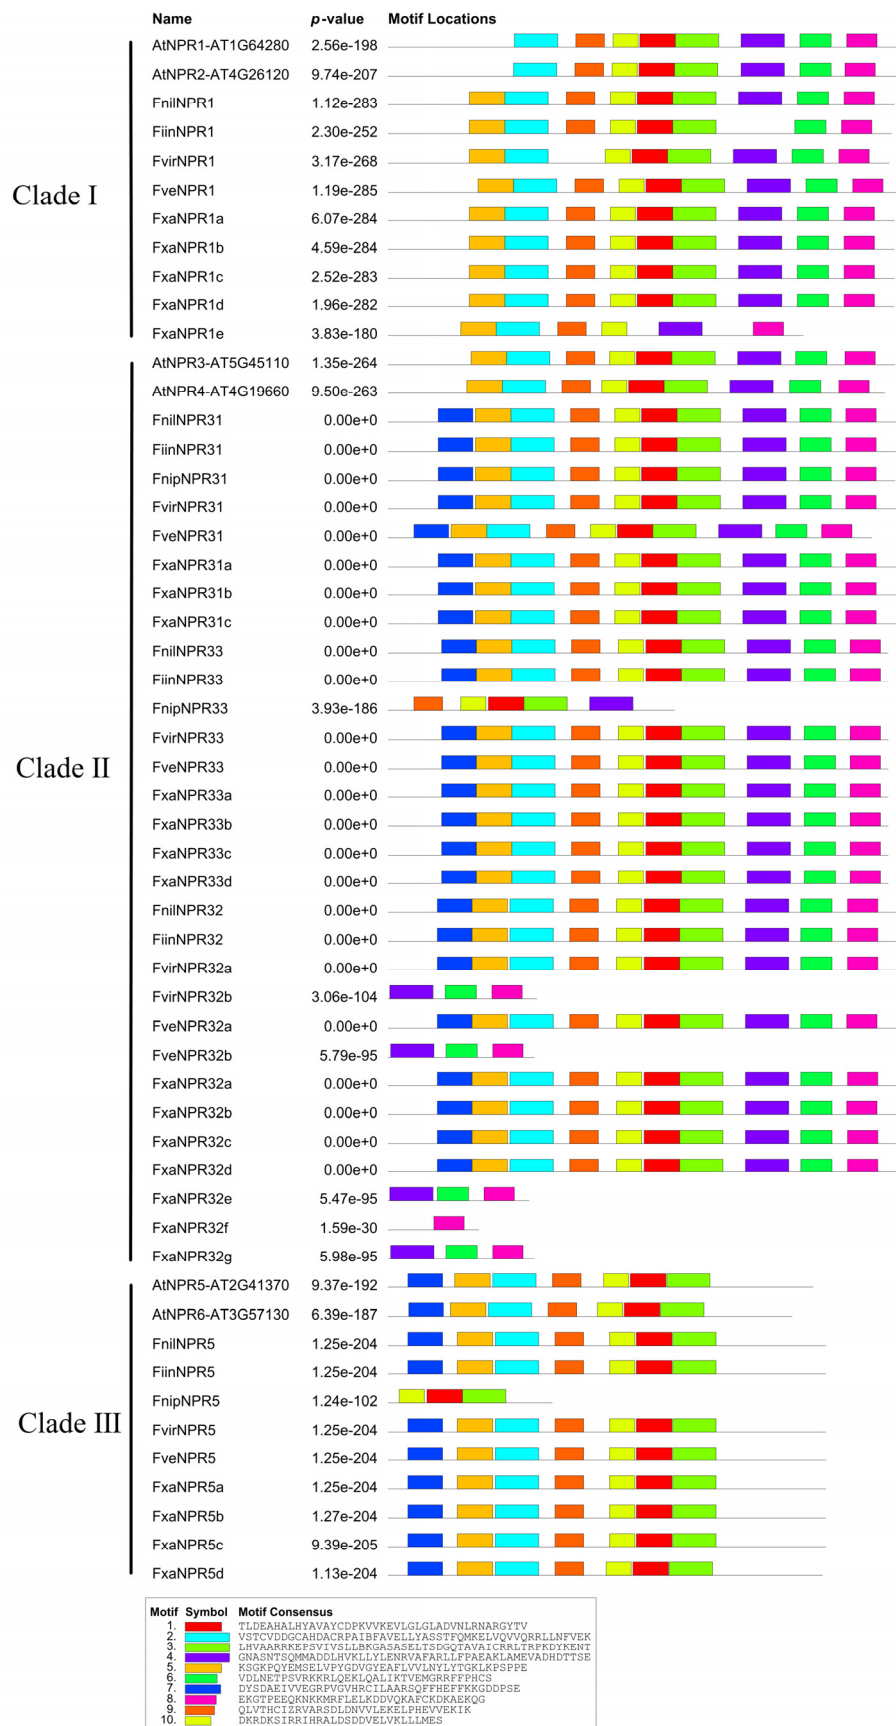

**Figure S2.** Sequence alignment for NPR1-like proteins from *Arabidopsis* and strawberry. **(A)** Alignment of six NPR1-like proteins from both *Fragaria vesca* and *Arabidopsis*. **(B)** Alignment of 11 amino acid sequences of clade I NPR proteins including AtNPR1-2, five from *F. × ananassa*, and one from *F. vesca*, *F. viridis*, *F. inumae*, and *F. nilgerrensis*, respectively. **(C)** Alignment of 32 amino acid sequences of clade II NPR proteins including AtNPR3-4, 14 from *F. × ananassa*, and two from *F. nipponica*, three from both *F. inumae* and *F. nilgerrensis*, four from both *F. vesca* and *F. viridis*. **(D)** Alignment of 11 amino acid sequences of clade III NPR proteins including AtNPR5-6, four from *F. × ananassa*, and one from *F. vesca*, *F. viridis*, *F. inumae*, *F. nipponica*, and *F. nilgerrensis*, respectively. The conserved IκB-like phosphodegron, BTB/POZ domains, ankyrin repeats, putative hinge regions, NIMIN1/2-binding regions and nuclear localization signals (NLSs) are underlined. The six cysteine residues involved in oligomer formation are marked with asterisks. The third SUMO-interaction motif (SIM) consensus [VIL]-[VIL]-x-[VIL] is indicated in an ellipse, and the SA-binding core (SBC) at the C-terminal is framed.

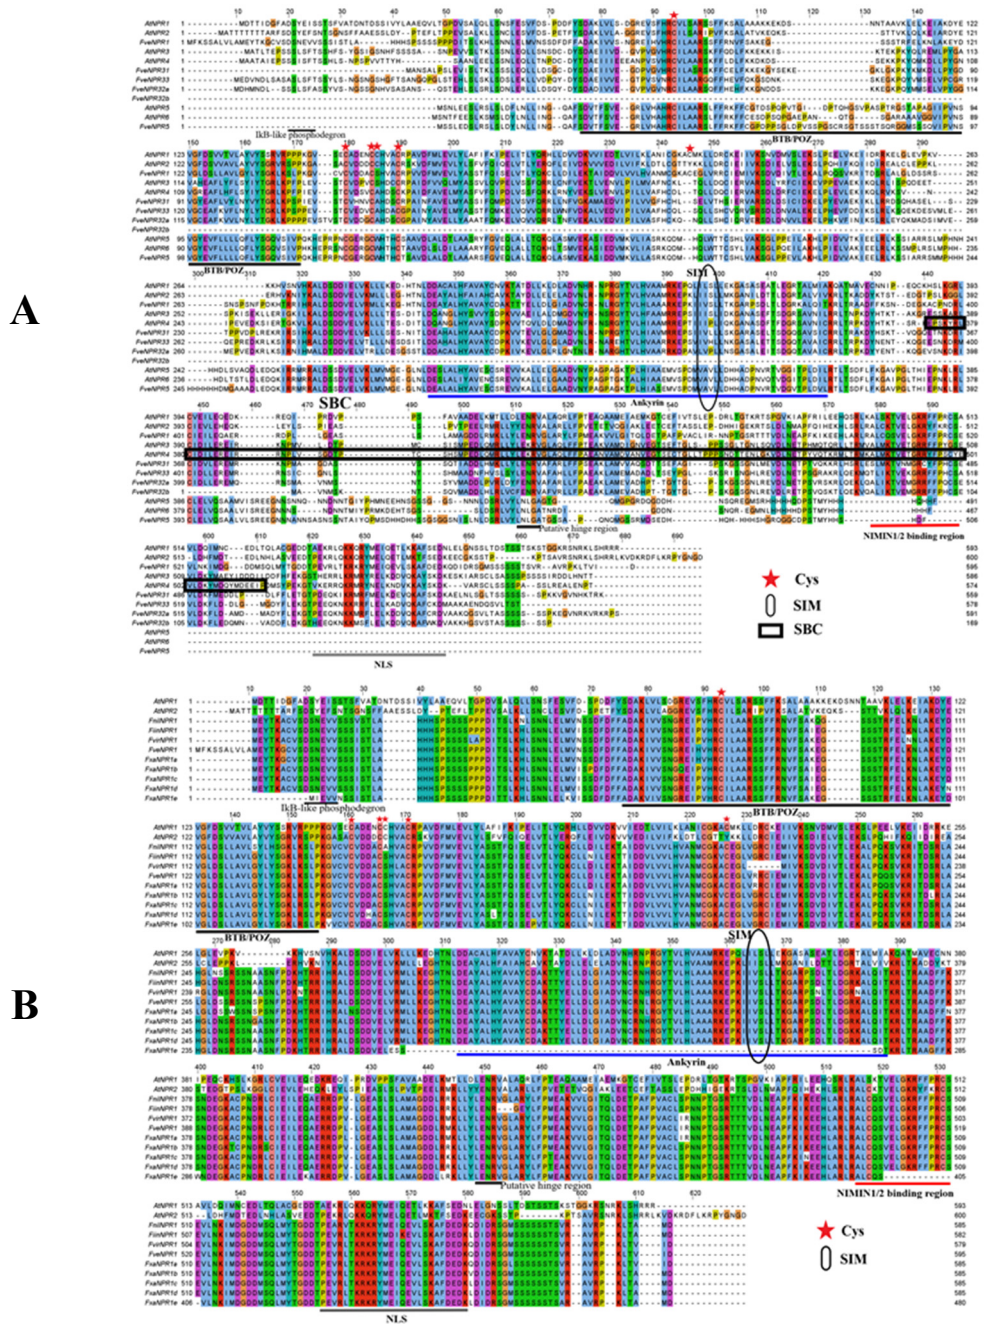



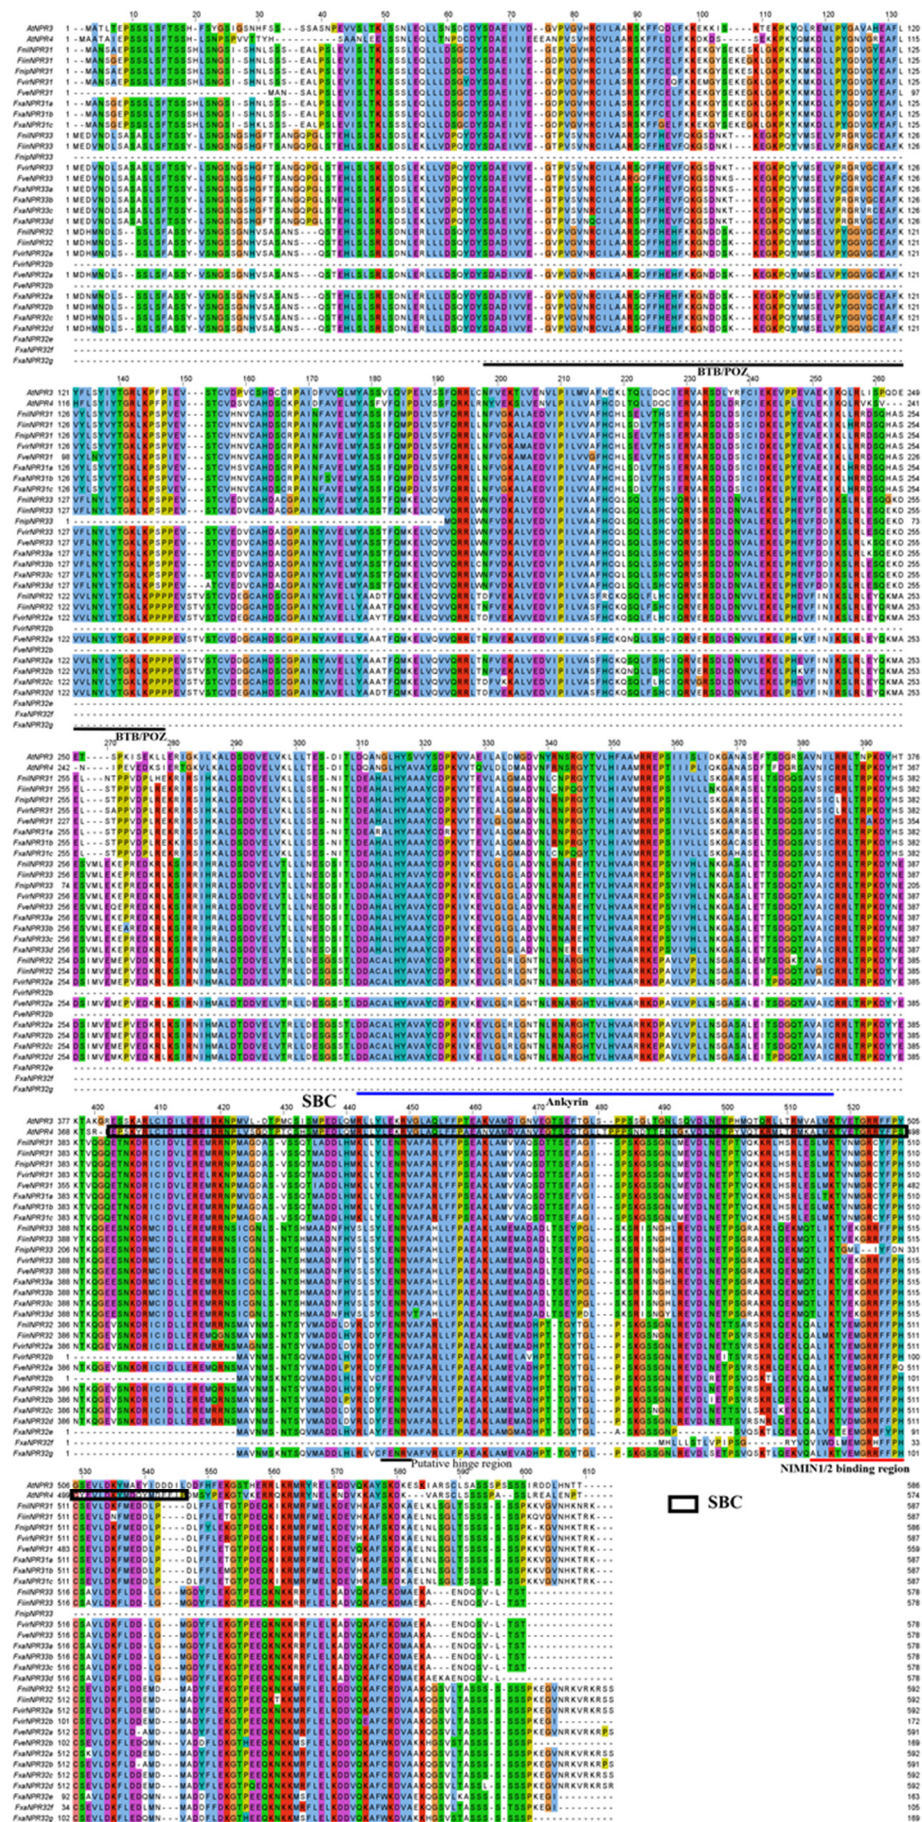

8

**NIMIN1/2 binding region**



D

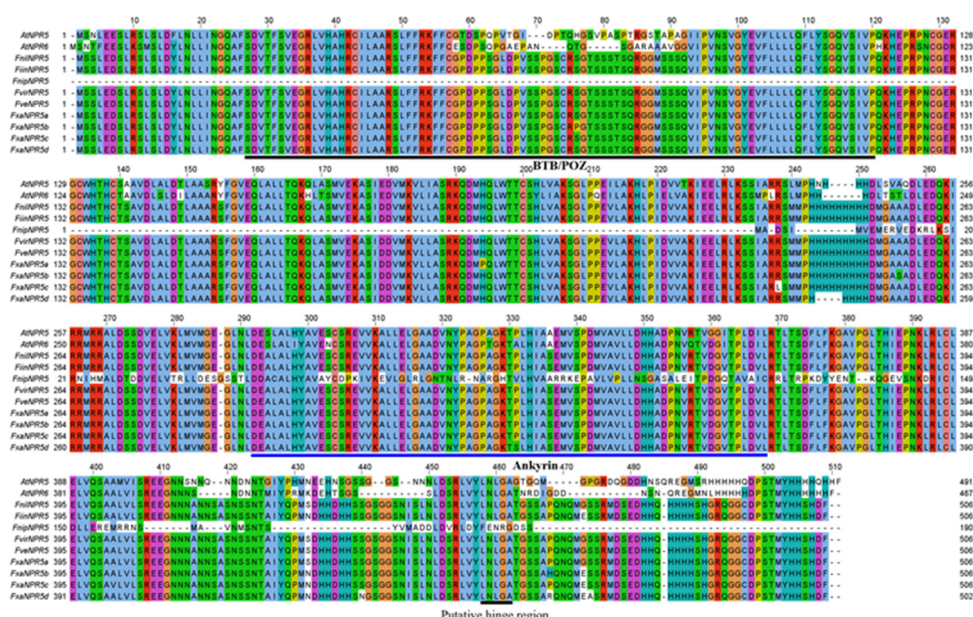

**Figure S3.** RNA-seq data showing the stable expression of genes coding proteins potentially directly or indirectly interacting with NPR1-like proteins in strawberry during *C. fruticola* invasion. The heatmap was generated using RPKM values normalized via Log<sub>2</sub>-transformation in strawberry mock-treated or infected by *C. fruticola* at 24, 72, or 96 h post inoculation (hpi). RNAseq data was reported previously [35].

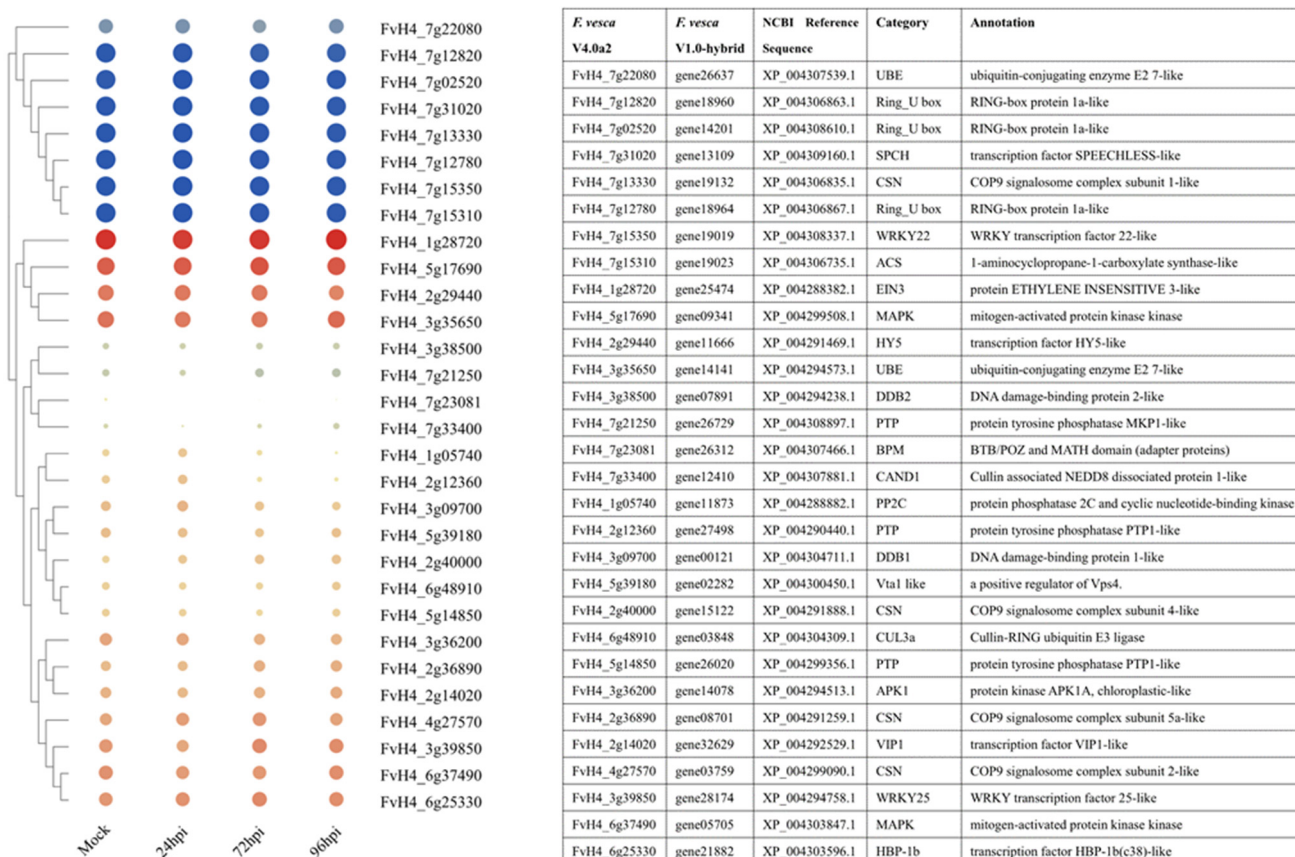

Supplement: s1 [file s1]
